# Supplementary material for: Identification of Bacterial Key Genes and Therapeutic Targets in Hypertensive Patients with Type 2 Diabetes using Bioinformatics Analysis
Source: Research Square preprint supplement (doi:10.21203/rs.3.rs-7760709/v1), 2025-10-21
Supplement: Supplementary file 1 [file 971648112ba337eba0a93b10.docx]

**Supplementary File**

**Table S1:** Ligand molecules associated with Type 2 diabetes and hypertension, compiled from the review of 26 published articles.

| **Articles** | **Ligands Name** |
| --- | --- |
| Attique et al., 2019 [1] | Teprotide, Fosinopril, Moexipril, Quinapril, Lisinopril, Cilazapril, Trandolapril, Enalapril, Captopril, Benazepril, Perindopril, Allicin |
| (Zhai et al., 2021)  [2] | Pinellia ternate, Nifedipine, β-Adrenergic receptor antagonists(β-blocker), Nicardipine, Diltiazem, Lacidipine, Atenolol, Cilazapril, Lisinopril, Quinapril, Enalapril, Captopril |
| (Oparil & Schmieder, 2015) [3] | BAY 94–8862 (finerenone), LCI699, C21, XNT, DIZE, rhACE2, HP-β-CD, Ang1-7, AVE0991, CGEN-856S, Alamandine, HPβCD, PC18, RB150 (QGC001), LCZ696, SLV-306 (Daglutril), PL-3994, C-ANP4-23, AR9281, Vasomera (PB1046), AZD1722 (Tenapanor), Etamicastat, CYT006-AngQβ, AngII-KLH, pHAV-4AngIIs, ATRQβ-001, ATR12181, DIF, ATryn |
| (MAB Van Bortel et al., 2001) [4] | Diuretic, Cicletanine, Nebivolol, Spironolactone, |
| (Prichard et al., 2001)  [5] | Bethanidine, Guanethidine, Methyldopa, Propranolol, Carvedilol, Labetalol, Nebivolol, Acebutolol, Atenolol, Bisoprolol, Metoprolol, Celiprolol, Minoxidil, Prazosin, Enalapril, Lisinopril, ACE inhibitors, Nifedipine, Diltiazem Verapamil, Dihydropyridine, Nitrendipine, amlodipine, trimazosin, doxazosin, moxonidine, hydrochlorothiazide, captopril |
| B. Vastrad et al., 2020 [6] | Flavonoids, saponins, tannins, glycosides |
| Mishra et al., 2017 [7] | Nicotinic acid, Glucocorticoids, Thyroid hormone, Alpha-adrenergic agonists |
| Bailey et al., 2016[8] | Alogliptin, Saxagliptin, Sitagliptin, Lixisenatide, Empaglifl ozin, Liraglutide, Canaglifl ozin, Exenatide, Linagliptin, Dapaglifl ozin, Dulaglutide, Acarbose |
| Krentz et al., 2008[9] | Sulfonylureas, Meglitinides, Metformin, Thiazolidinediones, α-Glucosidase, nhibitors, Insulin |
| Esposito et al., 2012[10] | Basal, Biphasic, Prandial, Basal bolus, GLP-1 agonists, Exenatide LAR, DPP-4 inhibitors, AGI, Thiazolidinediones, Sulphonylureas, Glinides, Metformin |
| Moller DE, 2001[11] | Insulin , Sulphonylureas, Metformin, Acarbose, Pioglitazone, rosiglitazone |
| J.M. & A.D., 2000[12] | Acetohexamide, olbutamide, Chlorpropamide, Tolazamide, Glipizide, Glipizide, Glyburide, Glyburide micronised, Glimepiride, Gliquidone, Gliclazide |
| Deans & Sattar, 2006[13] | Statins, Fibrates, ACE inhibitors and ARBs, Aspirin, Metformin, Glitazones |
| Avery et al., 2008[14] | Ciglitazone, Troglitazone, Pioglitazone, Englitazone, Darglitazone, Rosiglitazone, Isaglitazone |
| Paneni & Lüscher, 2017[15] | Biguanides, Sulfonylureas, Thiazolidinediones, peptide-1 receptor, Dipeptidyl peptidase-4, Sodium glucose |
| Adeghate et al., 2021 [16] | Sulfonylureas, Biguanides, Inhibitors of α-glucosidase, Thiazolidinediones, Meglitinides,  Dipeptidyl peptidase 4 inhibitors |
| R. Gupta et al., 2009[17] | Insulin, Sulphonylurea, Biguanides, Acarbose , Thiazolidinediones , PPAR/ dual agonists, GLP-1 analogs |
| Tamborlane et al., 2016[18] | Colesevelam, Exenatide, Linagliptin, Liraglutide, Saxagliptin, Sitagliptin, Taspoglutide, Empagliflozin, Exenatide, Alogliptin, Albiglutide, Omarigliptin, Dulaglutide, Lixisenatide, Sotagliflozin, Ertugliflozin |
| D.-Y. Lu et al., 2018[19] | Insulin and its derivatives, Sulphonylurea, Biguanide, Acarbose, Voglibose, Pioglitazone, Exercise, Curcumin, Resveratol, α-thioctic acids, |
| Thrasher, 2017[20] | Metformin, Albiglutide ,Dulaglutide, Exenatide, Exenatide XR, Liraglutide, Lixisenatide, Canagliflozin, Dapagliflozin, Empagliflozin, Alogliptin, Linagliptin, Sitagliptin, Saxagliptin, Glimepiride, Glipizide, Glyburide, Pioglitazone, Rosiglitazone |
| Kalsi A et al., 2015[21] | Thiazolidinediones, Biguanide, Sulfonylureas, Meglitinides, Insulin |
| Olokoba et al., 2012[22] | Biguanides, Sulfonylureas, Meglitinides, Thiazolidinediones, Alpha-Glucosidase Inhibitors, Incretin, Bromocriptine, Insulin |
| Kong et al., 2021[23] | Berberine, Resveratrol , Emodin ,Ellagic acid, Epigallocatechin gallate, Curcumin, Baicalein, Naringenin, Hesperetin, Chrysin, Genistein, Kaempferol, Eriodictyol ,Apigenin ,Quercetin  Steroids, Triterpenoids, Saponins, Glycosides, Carbohydrates, Alkaloids, Flavonoids , Tannins & Phenolic |
| Kong et al., 2021[24] | Tannin, Saponin, Alkaloid, Flavonoid, Phenol, Terpenoid, Carbohydrate |
| Singh et al., 2019[25] | Polyphenols, Amino Acid, Saponins, Terpenoids, Abscisic Acid, Lycopene and b-Carotene, Oxyphytosterol, Phytosterols/Stanols |
| Oboh et al., 2014[26] | Coumarin, p-Coumaric acid, o-Coumaric acid, Vanillic acid, Caffeic acid, Ferulic acid, Syringic acid, Sinapinic acid, Genistein, Apigenin, Naringenin, Kaempferol, Luteolin, Epicatechin, Epigallocatechin, Quercetin, 2-Phenylethyl-β-D-glucoside, Phenyl-6I-O-maloyl-β-D-glucoside |

**Table S2:** Non-bond interactions between receptor and ligand compounds based on binding affinity.

| **Interacting Amio acid** | **Category** | **Interaction type** | **Distance** |
| --- | --- | --- | --- |
| **fusA- Naringin** | | | |
| TYR537 | Hydrogen Bond | Conventional Hydrogen Bond | 2.479 |
| HISS572 | Hydrogen Bond | Conventional Hydrogen Bond | 2.771 |
| VAL574 | Hydrogen Bond | Conventional Hydrogen Bond | 2.876 |
| ASP573 | Hydrogen Bond | Carbon Hydrogen Bond | 3.799 |
| TYR571 | Hydrogen Bond | Carbon Hydrogen Bond | 3.521 |
| PHE581 | Hydrophobic | Pi-Sigma | 3.642 |
| PHE581 | Hydrophobic | Pi-Pi Stacked | 4.528 |
| VAL533 | Hydrophobic | Alkyl | 4.601 |
| PRO534 | Hydrophobic | Alkyl | 5.401 |
| TYR537 | Hydrophobic | Pi- Alkyl | 4.935 |
| VAL541 | Hydrophobic | Pi- Alkyl | 5.271 |
| **mdh- Neohesperidin** | | | |
| THR211 | Hydrogen Bond | Conventional Hydrogen Bond | 2.614 |
| GLY176 | Hydrogen Bond | Conventional Hydrogen Bond | 2.780 |
| VAL146 | Hydrogen Bond | Conventional Hydrogen Bond | 2.388 |
| GLY210 | Hydrogen Bond | Conventional Hydrogen Bond | 2.534 |
| MET227 | Hydrogen Bond | Conventional Hydrogen Bond | 2.943 |
| ASP301 | Hydrogen Bond | Carbon Hydrogen Bond | 2.568 |
| ASP86 | Electrostatic | Pi-Anion | 4.131 |
| **gyrB- Bromocriptine** | | | |
| THR34 | Hydrogen Bond | Carbon Hydrogen Bond | 3.350 |
| HIS38 | Electrostatic | PI-Cation | 4.635 |
| LEU119 | Hydrophobic | Pi-Sigma | 3.913 |
| ILE190 | Hydrophobic | Alkyl | 3.928 |
| ILE190 | Hydrophobic | Alkyl | 5.092 |
| LEU119 | Hydrophobic | Alkyl | 5.481 |
| PHE41 | Hydrophobic | Pi- Alkyl | 5.106 |
| LEU119 | Hydrophobic | Pi- Alkyl | 5.106 |

**References**

1. Attique, S.A.; Hassan, M.; Usman, M.; Atif, R.M.; Mahboob, S.; Al-Ghanim, K.A.; Bilal, M.; Nawaz, M.Z. A Molecular Docking Approach to Evaluate the Pharmacological Properties of Natural and Synthetic Treatment Candidates for Use against Hypertension. *Int. J. Environ. Res. Public Health* **2019**, *16*, doi:10.3390/IJERPH16060923.

2. Wang, Z.; Yang, T.; Fu, H. Prevalence of Diabetes and Hypertension and Their Interaction Effects on Cardio-Cerebrovascular Diseases: A Cross-Sectional Study. *BMC Public Health* **2021**, *21*, 1224, doi:10.1186/S12889-021-11122-Y/TABLES/7.

3. Oparil, S.; Schmieder, R.E. New Approaches in the Treatment of Hypertension. *Circ. Res.* **2015**, *116*, 1074–1095, doi:10.1161/CIRCRESAHA.116.303603.

4. Van Bortel, L.M.A.B.; Struijker-Boudier, H.A.J.; Safar, M.E. Pulse Pressure, Arterial Stiffness, and Drug Treatment of Hypertension. *Hypertension* **2001**, *38*, 914–921, doi:10.1161/HY1001.095773.

5. Erickson, M.F.; Sroufe, L.A.; Egeland, B. The Relationship between Quality of Attachment and Behavior Problems in Preschool in a High-Risk Sample. *Monogr. Soc. Res. Child Dev.* **1985**, *50*, 147, doi:10.2307/3333831.

6. Vastrad, B.; Tengli, A.; Vastrad, C.; Kotturshetti, I. Bioinformatics Analysis of Key Genes and Pathways for Obesity Associated Type 2 Diabetes Mellitus as a Therapeutic Target. *bioRxiv* **2020**, doi:10.1101/2020.12.25.424383.

7. Mishra, S.; Singh, S.; Mishra, R.; Jain, P.A.; Mishra, R.R.; Kumar Mishra, V. Bioinformatics Analysis of Genes Associted With Type 2 Diabetes Mellitus. *Int. J. Res. -GRANTHAALAYAH* **2017**, *5*, 159–178, doi:10.29121/granthaalayah.v5.i7.2017.2118.

8. Bailey, C.J.; Tahrani, A.A.; Barnett, A.H. Future Glucose-Lowering Drugs for Type 2 Diabetes. *Lancet Diabetes Endocrinol.* **2016**, *4*, 350–359, doi:10.1016/S2213-8587(15)00462-3.

9. Krentz, A.J.; Patel, M.B.; Bailey, C.J. New Drugs for Type 2 Diabetes Mellitus. *Drugs* **2008**, *68*, 2131–2162, doi:10.2165/00003495-200868150-00005.

10. Esposito, K.; Chiodini, P.; Bellastella, G.; Maiorino, M.I.; Giugliano, D. Proportion of Patients at HbA1c Target <7% with Eight Classes of Antidiabetic Drugs in Type 2 Diabetes: Systematic Review of 218 Randomized Controlled Trials with 78 945 Patients. *Diabetes, Obes. Metab.* **2012**, *14*, 228–233, doi:10.1111/j.1463-1326.2011.01512.x.

11. New Drug Targets for Type 2 Diabetes and the Metabolic Syndrome.

12. Chehade, J.M.; Mooradian, A.D. A Rational Approach to Drug Therapy of Type 2 Diabetes Mellitus. *Drugs* **2000**, *60*, 95–113, doi:10.2165/00003495-200060010-00006.

13. Deans, K.A.; Sattar, N. “Anti-Inflammatory” Drugs and Their Effects on Type 2 Diabetes. *Diabetes Technol. Ther.* **2006**, *8*, 18–27, doi:10.1089/dia.2006.8.18.

14. Mizuno, C.S.; Chittiboyina, A.G.; Kurtz, T.W.; Pershadsingh, H.A.; Avery, M.A. Type 2 Diabetes and Oral Antihyperglycemic Drugs. *Curr. Med. Chem.* **2008**, *15*, 61–74.

15. Paneni, F.; Lüscher, T.F. Cardiovascular Protection in the Treatment of Type 2 Diabetes: A Review of Clinical Trial Results Across Drug Classes. *Am. J. Cardiol.* **2017**, *120*, S17–S27, doi:10.1016/j.amjcard.2017.05.015.

16. Adeghate, E.A.; Kalász, H.; Al Jaberi, S.; Adeghate, J.; Tekes, K. Tackling Type 2 Diabetes-Associated Cardiovascular and Renal Comorbidities: A Key Challenge for Drug Development. *Expert Opin. Investig. Drugs* **2021**, *30*, 85–93, doi:10.1080/13543784.2021.1865914.

17. Gupta, R.; Walunj, S.; Tokala, R.; Parsa, K.; Singh, S.; Pal, M. Emerging Drug Candidates of Dipeptidyl Peptidase IV (DPP IV) Inhibitor Class for the Treatment of Type 2 Diabetes. *Curr. Drug Targets* **2009**, *10*, 71–87, doi:10.2174/138945009787122860.

18. Tamborlane, W. V.; Haymond, M.W.; Dunger, D.; Shankar, R.; Gubitosi-Klug, R.; Bethin, K.; Karres, J.; Tomasi, P.; Libman, I.; Hale, P.H.; et al. Expanding Treatment Options for Youth With Type 2 Diabetes: Current Problems and Proposed Solutions. *Diabetes Care* **2016**, *39*, 323–329, doi:10.2337/dc15-1649.

19. Lu, D.-Y.; Che, J.-Y.; Yarla, N.S.; Wu, H.-Y.; Lu, T.-R.; Xu, B.; Wu, S.-Y.; Ding, J.; Lu, Y.; Zhu, H. Type 2 Diabetes Treatment and Drug Development Study. *Open Diabetes J.* **2018**, *8*, 22–33, doi:10.2174/1876524601808010022.

20. Thrasher, J. Pharmacologic Management of Type 2 Diabetes Mellitus: Available Therapies. *Am. J. Cardiol.* **2017**, *120*, S4–S16, doi:10.1016/j.amjcard.2017.05.009.

21. Kalsi A; Singh S; Taneja N; Kukal S; Mani S Current Treatments for Type 2 Diabetes, Their Side Effects and Possible Complementary Treatments. *Int. J. Pharm. Pharm. Sci.* **2015**, *7*, 13–18.

22. Olokoba, A.B.; Obateru, O.A.; Olokoba, L.B. Type 2 Diabetes Mellitus: A Review of Current Trends. *Oman Med. J.* **2012**, *27*, 269–273, doi:10.5001/omj.2012.68.

23. Kong, M.; Xie, K.; Lv, M.; Li, J.; Yao, J.; Yan, K.; Wu, X.; Xu, Y.; Ye, D. Anti-Inflammatory Phytochemicals for the Treatment of Diabetes and Its Complications: Lessons Learned and Future Promise. *Biomed. Pharmacother.* **2021**, *133*, doi:10.1016/j.biopha.2020.110975.

24. Hassan, M.M.; Uddin, S.; Bhowmik, A.; Ashraf, A.; Islam, M.M.; Rokeya, B. Phytochemical Screening and Antidiabetic Effects of Fruit Rind of Momordica Dioica Roxb. on Streptozocin Induced Type 2 Diabetic Rats. *Heliyon* **2022**, *8*, doi:10.1016/j.heliyon.2022.e08771.

25. Singh, R.; Kazmi, I.; Afzal, M.; Imam, F.; Alharbi, K.S. Dietary Phytochemicals and Their Potential Effects on Diabetes Mellitus 2. *Plant Hum. Heal. Pharmacol. Ther. Uses* **2019**, *3*, 65–86, doi:10.1007/978-3-030-04408-4_4.

26. Oboh, G.; Olabiyi, A.A.; Akinyemi, A.J.; Ademiluyi, A.O. Inhibition of Key Enzymes Linked to Type 2 Diabetes and Sodium Nitroprusside-Induced Lipid Peroxidation in Rat Pancreas by Water-Extractable Phytochemicals from Unripe Pawpaw Fruit (Carica Papaya). *J. Basic Clin. Physiol. Pharmacol.* **2014**, *25*, 21–34, doi:10.1515/jbcpp-2013-0002.
